# Supplementary material
Source: PubMed Central journal article supplement (PMC6902174)
Supplement: jamaneurol-77-327-s001.pdf [file jamaneurol-77-327-s001.pdf]

## Supplementary Online Content

Krysko KM, Rutatangwa A, Graves J, Lazar A, Waubant E. Association between breastfeeding and postpartum multiple sclerosis relapses: a systematic review and meta-analysis. *JAMA Neurol*. Published online December 9, 2019.  
doi:10.1001/jamaneurol.2019.4173

**eTable.** Characteristics of Included Studies

**eFigure 1.** Funnel Plot Evaluating for Publication Bias With No Publication Bias Demonstrated

**eFigure 2.** Stratified Data on Association of Breastfeeding With Postpartum Multiple Sclerosis Relapses in Studies Reporting 3-Month and 6-Month Postpartum Relapse Outcomes

**eReferences.**

This supplementary material has been provided by the authors to give readers additional information about their work.

**eTable.** Characteristics of included studies.

| Source                                  | Study design         | Study setting               | Total N                     | MS diagnostic criteria & types                         | Mean age             | Mean disease duration | Pre- & pregnancy ARR                         | Baseline EDSS | Pre-pregnancy DMT | Definition of BF exposure groups                          | Definition of relapse outcome    | Time period PP | Group differences BF vs non-BF                                             | PP DMT use BF vs non-BF                                                   |
|-----------------------------------------|----------------------|-----------------------------|-----------------------------|--------------------------------------------------------|----------------------|-----------------------|----------------------------------------------|---------------|-------------------|-----------------------------------------------------------|----------------------------------|----------------|----------------------------------------------------------------------------|---------------------------------------------------------------------------|
| <b>Achiron 2004</b> <sup>1,a</sup>      | Retrospective cohort | Israel                      | 108                         | Poser criteria; RRMS                                   | 28 +/- 3.3 y         | 5.1 +/- 2.4 y         | 1 y pre: 0.94<br>Preg: 0.48                  | 1.70          | 96%               | BF: ≥ 3 weeks, non-exclusive<br>NBF: < 3 weeks or none    | ≥ 48 hrs with ≥1.0 increase EDSS | 3 mo           | N/A                                                                        | None; all had IVIG                                                        |
| <b>Airas 2010</b> <sup>2</sup>          | Prospective cohort   | Finland                     | 61                          | N/A                                                    | 30.5 y (range 23-42) | 5.7 y (range 0-17.5)  | 1 y pre: 0.82 +/- 0.98<br>T3: 0.4 +/- 1.2    | 1.33 +/- 1.17 | N/A               | BF: ≥2 mo exclusive<br>NBF: Non-exclusive, < 2 mo or none | N/A                              | 6 mo           | BF less if active MS pre-pregnancy                                         | BF: 1 IFN β; NBF: 5 IFN β; 1 IVIG but unclear which group                 |
| <b>Benoit 2016</b> <sup>3,a</sup>       | Prospective cohort   | France & Italy Multi-center | 93 but 78 for BF analysis   | Poser criteria or 2005 McDonald criteria; all MS types | 32.1 +/- 4.1 y       | 9.1 +/- 3.9 y         | 1 y pre: 0.53 +/- 0.69<br>Preg: 0.32 +/- 0.6 | 1.9 +/- 1.5   | 34% <sup>b</sup>  | BF: Any BF<br>NBF: No BF                                  | ≥ 24 hrs, no EDSS requirement    | 3 mo           | N/A                                                                        | N/A                                                                       |
| <b>Confavreux 1998</b> <sup>4,a</sup>   | Prospective cohort   | 12 European countries       | 227 but 209 for BF analysis | Poser criteria; all MS types                           | 30 +/- 4 y           | 6 +/- 4 y             | 1 y pre: 0.7 +/- 0.9<br>T3: 0.2 +/- 1.0      | 1.3 +/- 1.4   | N/A               | BF: Any BF<br>NBF: No BF                                  | ≥ 24 hrs, no EDSS requirement    | 3 mo           | BF lower pre-pregnancy ARR (0.6 vs 0.8) & lower pregnancy ARR (0.3 vs 0.5) | 4 azathioprine, 1 mitoxantrone but unclear which group                    |
| <b>De Las Heras 2007</b> <sup>5,a</sup> | Retrospective cohort | Spain Multi-center          | 88 but 62 for BF analysis   | Poser criteria; RRMS & SPMS                            | 30.5 +/- 4.2 y       | 5.5 +/- 2.5 y         | 1 y pre: 0.61<br>Preg: 0.31                  | 1.70          | 100%              | BF: Any BF<br>NBF: No BF                                  | N/A                              | 3 mo           | N/A                                                                        | 69% resumed DMT shortly after delivery; Longer time to start DMT PP in BF |

| Source                                               | Study design                                                  | Study setting          | Total N | MS diagnostic criteria & types       | Mean age                        | Mean disease duration          | Pre- & pregnancy ARR                                          | Baseline EDSS | Pre-pregnancy DMT | Definition of BF exposure groups                                           | Definition of relapse outcome                      | Time period PP    | Group differences BF vs non-BF                                                                       | PP DMT use BF vs non-BF                                                                     |
|------------------------------------------------------|---------------------------------------------------------------|------------------------|---------|--------------------------------------|---------------------------------|--------------------------------|---------------------------------------------------------------|---------------|-------------------|----------------------------------------------------------------------------|----------------------------------------------------|-------------------|------------------------------------------------------------------------------------------------------|---------------------------------------------------------------------------------------------|
| <b>Fernández Liguori 2009<sup>6,a</sup></b>          | Retrospective cohort (Cross-sectional survey & record review) | Argentina Multi-center | 103     | McDonald criteria; all MS types      | 30.5 +/- 5.2 y                  | 7.3 y                          | 1 y pre: 0.22 (95% CI 0.12-0.31); T3: 0.04 (95%CI -0.04-0.12) | N/A           | 30%               | BF: Any BF ≥ 1 day<br>NBF: None or <1 day                                  | ≥ 24 h, require objective finding on neuro exam    | 12 mo             | N/A                                                                                                  | Prophylaxis with IVIG (3) & steroids (3), not separated by BF group; 16 NBF due to DMT      |
| <b>Fernández Liguori 2012<sup>7</sup> [Abstract]</b> | Retrospective cohort                                          | Argentina 3 centers    | 40      | McDonald criteria; all RRMS          | 41.7 +/- 8.8 (at time of study) | Median 16.4 (at time of study) | 1 y pre: 0.02<br>Preg: 0.005                                  | N/A           | N/A               | BF: Exclusive for ≥2mo<br>NBF: Non-exclusive BF, <2mo, or none             | ≥ 24 h, require objective finding on neuro exam    | 6 mo              | NBF higher ARR pre-pregnancy (NBF 0.03 vs BF 0.02), but similar age, disease duration, pregnancy ARR | N/A                                                                                         |
| <b>Gulick 2002<sup>8</sup></b>                       | Prospective cohort with mailed questionnaires                 | US and Canada          | 175     | N/A; all MS types                    | 32.7 +/- 4.2 y                  | 5.0 +/- 3.9 y                  | 1 y pre: 0.58;<br>Preg: 0.18                                  | N/A           | N/A               | BF: Any BF for all or part of 12 mo PP, non-exclusive<br>NBF: None or ≤2 d | ≥ 24 hrs, no EDSS requirement, neurology confirmed | 12 mo (also 6 mo) | BF group 2 y older, 6 mo longer MS, fewer with relapse in pregnancy                                  | More DMT in NBF (0-3 mo PP BF 16.4% vs NBF 65.7% DMT); BF: 7 DMT concurrent (6 IFN β, 1 GA) |
| <b>Haas 2007<sup>9,a</sup></b>                       | Prospective cohort, RCT of IVIG                               | 9 European countries   | 163     | N/A; RRMS w/ ≥1 relapse in 2 y prior | 29.6 +/- 4.0 y                  | 6.5 +/- 4.4 y                  | 2 y pre: 1.0 +/- 0.7;<br>Preg: 0.4 +/- 0.6                    | 1.6 +/- 1.3   | 48%               | BF: Divided into <3mo and ≥3 mo, non-exclusive<br>NBF: None                | ≥24h, no EDSS requirement, neurology confirmed     | 3 mo              | N/A                                                                                                  | All received IVIG in both groups                                                            |

| Source                                      | Study design                               | Study setting                | Total N                   | MS diagnostic criteria & types   | Mean age           | Mean disease duration | Pre- & pregnancy ARR                    | Baseline EDSS | Pre-pregnancy DMT | Definition of BF exposure groups                                                                                       | Definition of relapse outcome                  | Time period PP    | Group differences BF vs non-BF                                                                                                         | PP DMT use BF vs non-BF                                                                                                               |
|---------------------------------------------|--------------------------------------------|------------------------------|---------------------------|----------------------------------|--------------------|-----------------------|-----------------------------------------|---------------|-------------------|------------------------------------------------------------------------------------------------------------------------|------------------------------------------------|-------------------|----------------------------------------------------------------------------------------------------------------------------------------|---------------------------------------------------------------------------------------------------------------------------------------|
| Hanulíková 2013 <sup>10,a</sup>             | Retrospective cohort                       | Czech Republic Single center | 76 but 73 for BF analysis | N/A; all RRMS                    | 31 y (range 21-40) | N/A                   | Pre N/A<br>Preg: 0.08                   | 1.4           | N/A               | BF: Any BF, non-exclusive<br>NBF: None                                                                                 | Chart documented relapse                       | 6 mo              | N/A                                                                                                                                    | 93.4% PP IVIG, not listed by group                                                                                                    |
| Hellwig 2009 <sup>11</sup> [Correspondence] | Retrospective cohort with some prospective | Germany Multicenter          | 213                       | N/A                              | 31.2 +/- 4.0 y     | N/A                   | N/A                                     | N/A           | N/A               | BF: Exclusive ≥4 mo<br>NBF: Did not exclusive BF ≥4 mo                                                                 | N/A                                            | 3 mo              | BF older & less likely on DMT pre-pregnancy; no difference in disease duration, pre-pregnancy ARR                                      | NBF group more likely on DMT                                                                                                          |
| Hellwig 2015 <sup>12</sup>                  | Prospective cohort                         | Germany Multicenter          | 201                       | 2005 McDonald criteria; all RRMS | 31.3 +/- 4.2 y     | Median 4.5 y          | 2 y pre: 0.63; 42 had pregnancy relapse | N/A           | 89%               | BF: Intent to BF ≥2 mo exclusively<br>NBF: BF with supplemental feeding <2 mo (for reasons other than relapse) or none | ≥24h, no EDSS requirement, neurology confirmed | 6 mo (also 12 mo) | BF older, less likely on DMT pre-pregnancy, & less likely relapse in pregnancy; no difference in disease duration or ARR pre-pregnancy | BF less likely to start DMT in first 30 d PP. 2 started DMT within 30 d and BF some (1 exclusive BF). NBF 29 resumed DMT within 30 d. |

| Source                                               | Study design               | Study setting          | Total N | MS diagnostic criteria & types   | Mean age       | Mean disease duration         | Pre- & pregnancy ARR                   | Baseline EDSS         | Pre-pregnancy DMT | Definition of BF exposure groups                               | Definition of relapse outcome                   | Time period PP | Group differences BF vs non-BF                                                                             | PP DMT use BF vs non-BF                                                                    |
|------------------------------------------------------|----------------------------|------------------------|---------|----------------------------------|----------------|-------------------------------|----------------------------------------|-----------------------|-------------------|----------------------------------------------------------------|-------------------------------------------------|----------------|------------------------------------------------------------------------------------------------------------|--------------------------------------------------------------------------------------------|
| <b>Horvat Ledinek 2013<sup>13,a</sup> [Abstract]</b> | Cohort (unclear follow-up) | Slovenia single center | 67      | N/A                              | 34.5 +/- 4.3 y | 7.9 +/- 4 y                   | 2 y pre: 0.48; Preg: 0.16              | 1.47 +/- 1.37         | 60%               | N/A                                                            | N/A                                             | 24 mo          | N/A                                                                                                        | All received IVIG prophylaxis PP                                                           |
| <b>Iorio 2009<sup>14</sup> [Correspondence]</b>      | Cohort (unclear follow-up) | Italy single center    | 23      | N/A                              | 31.5 +/- 3.8 y | 5.0 +/- 3.4 y                 | Pre: 0.88 +/- 0.69; Preg N/A           | N/A                   | 70%               | BF: Exclusive for ≥2mo<br>NBF: Non-exclusive BF, <2mo, or none | N/A                                             | 12 mo          | No difference age or pre-pregnancy ARR; longer disease duration & more pre-pregnancy DMT in NBF            | N/A                                                                                        |
| <b>Jesus-Ribeiro 2017<sup>15</sup></b>               | Retrospective cohort       | Portugal single center | 111     | 2010 McDonald criteria; all RRMS | 31.9 +/- 4.9 y | 4.9 +/- 2.7 y                 | 1 y pre: 0.6 +/- 0.8; Preg 0.3 +/- 0.6 | 1.6 +/- 0.7           | 80%               | BF: Any duration, non-exclusive<br>NBF: None                   | ≥24 h with objective worsening on neuro exam    | 12 mo          | BF longer disease duration, lower ARR pre-pregnancy (BF 0.5 vs NBF 0.7) & in pregnancy (BF 0.2 vs NBF 0.3) | BF group started DMT PP later than NBF. 99 started DMT in 12 mo PP, not reported by group. |
| <b>Langer-Gould 2009<sup>16</sup></b>                | Prospective cohort         | US 2 centers           | 29      | Poser criteria; 28 RRMS, 1 SPMS  | 32.8 +/- 4.1 y | Median 5.1 y (range 1.6-20.8) | 2 y pre: 0.71; Preg: 0.18              | 27 EDSS ≤2; 2 EDSS ≥4 | 76%               | BF: Exclusive ≥2mo<br>NBF: Non-exclusive BF, <2mo, or none     | ≥48 h, no EDSS requirement, neurology confirmed | 12 mo          | NBF more on DMT pre-conception, but age,                                                                   | NBF more likely to resume DMT in 12 mo PP (NBF 80% vs BF 43%) &                            |

| Source                                            | Study design                                    | Study setting                            | Total N | MS diagnostic criteria & types          | Mean age       | Mean disease duration | Pre- & pregnancy ARR                           | Baseline EDSS | Pre-pregnancy DMT | Definition of BF exposure groups                           | Definition of relapse outcome | Time period PP | Group differences BF vs non-BF                             | PP DMT use BF vs non-BF                                       |
|---------------------------------------------------|-------------------------------------------------|------------------------------------------|---------|-----------------------------------------|----------------|-----------------------|------------------------------------------------|---------------|-------------------|------------------------------------------------------------|-------------------------------|----------------|------------------------------------------------------------|---------------------------------------------------------------|
|                                                   |                                                 |                                          |         |                                         |                |                       |                                                | (1 BF, 1 NBF) |                   |                                                            |                               |                | disease duration, pre or pregnancy relapses, EDSS similar  | shorter time to DMT PP                                        |
| <b>Langer-Gould 2019<sup>17</sup> [Abstract]</b>  | Cohort (prospective EHR & retrospective survey) | US population-based with Kaiser EHR data | 466     | N/A                                     | N/A            | N/A                   | 1 y pre: 0.39; Preg: 0.14 to 0.07              | N/A           | 62% <sup>b</sup>  | BF: Exclusive ≥2mo<br>NBF: Non-exclusive BF, <2mo, or none | N/A                           | 12 mo          | N/A                                                        | BF: 28% DMT while BF exclusively (mostly GA/IFN β) vs 49% NBF |
| <b>Nelson 1988<sup>18</sup></b>                   | Retrospective cohort with interview             | US multi-center                          | 191     | Schumacher criteria; non-progressive MS | N/A            | N/A                   | Pre N/A<br>Preg: 0.13                          | N/A           | N/A               | BF: Any BF reported, non-exclusive<br>NBF: None            | Self-reported                 | 9 mo           | N/A                                                        | N/A                                                           |
| <b>Nikseresht 2017<sup>19,a</sup> [Abstract]</b>  | Retrospective cohort with survey                | Iran single center                       | 75      | N/A                                     | 33.2 +/- 4.5 y | N/A                   | 1y pre: 24% ≥1 relapse<br>Preg: 13% ≥1 relapse | N/A           | N/A               | BF: Any BF<br>NBF: No BF                                   | Self-reported                 | 9 mo           | N/A                                                        | N/A                                                           |
| <b>Perez-Sanchez 2014<sup>20</sup> [Abstract]</b> | Retrospective cohort with interview             | Spain single center                      | 79      | N/A; all RRMS                           | 31.5 y         | N/A                   | N/A                                            | N/A           | N/A               | BF: Any BF<br>NBF: No BF                                   | Self-reported                 | N/A            | No difference disease duration, EDSS, ARR pre or pregnancy | NBF shorter time to restart DMT PP                            |

| Source                                                 | Study design       | Study setting                | Total N | MS diagnostic criteria & types          | Mean age       | Mean disease duration | Pre- & pregnancy ARR                          | Baseline EDSS              | Pre-pregnancy DMT | Definition of BF exposure groups                                              | Definition of relapse outcome                   | Time period PP | Group differences BF vs non-BF                                                              | PP DMT use BF vs non-BF                                      |
|--------------------------------------------------------|--------------------|------------------------------|---------|-----------------------------------------|----------------|-----------------------|-----------------------------------------------|----------------------------|-------------------|-------------------------------------------------------------------------------|-------------------------------------------------|----------------|---------------------------------------------------------------------------------------------|--------------------------------------------------------------|
| <b>Portaccio 2014</b> <sup>21</sup>                    | Prospective cohort | Italian multi-center         | 350     | McDonald criteria 2001; all types of MS | 31.8 +/- 4.7 y | 7.2 +/- 4.8           | 1 y pre: 0.37 +/- 0.71<br>Preg: 0.11 +/- 0.35 | 1.5 (IQR 1-2)              | 50%               | BF: Exclusive ≥2mo<br>NBF: Non-exclusive BF, <2mo, or none                    | ≥ 24 h with objective worsening neurologic exam | 12 mo          | NBF higher EDSS (NBF 1.6 vs BF 1.3). No difference age, disease duration, ARR pre-pregnancy | BF 11% vs NBF 27% resumed DMT within 3 mo & before a relapse |
| <b>Runia 2015</b> <sup>22</sup>                        | Prospective cohort | Netherlands single center    | 43      | McDonald criteria 2001; all RRMS        | 31.5 +/- 3.8 y | 5.5 +/- 6.0 y         | 1 y pre: 0.47; T3: 0.09                       | Median 1.5 (IQR 1-2)       | N/A               | BF: Non-exclusive and any duration<br>NBF: None                               | ≥ 24 h, no EDSS requirement                     | 3 mo           | N/A                                                                                         | 3 IVIG PP (group not listed); no DMT use 0-3 mo PP           |
| <b>Sahebi Vaighan 2017</b> <sup>23</sup><br>[Abstract] | Prospective cohort | Iran single center           | 39      | N/A; all RRMS                           | 30.6 +/- 5.1 y | N/A                   | Pre N/A; Preg: 0                              | N/A                        | N/A               | BF: Exclusive ≥ 3 mo<br>NBF: Non-exclusive, < 3 mo, none                      | N/A                                             | 6 mo, 36 mo    | N/A                                                                                         | N/A                                                          |
| <b>Worthington 1994</b> <sup>24,a</sup>                | Prospective cohort | United Kingdom single center | 15      | Poser criteria; all types of MS         | 30.0 +/- 3.1   | 9 +/- 3.6 y           | 1 y pre: 0.57; Preg: 0.48                     | Median 4.5 (range 3.5-6.0) | N/A               | BF: Required ongoing BF, non-exclusive<br>NBF: None or stopped before relapse | ≥ 24 h, no EDSS requirement                     | 6 mo           | N/A                                                                                         | N/A                                                          |

N sample size; MS multiple sclerosis; ARR annualized relapse rate; EDSS Expanded Disability Status Scale; BF breastfeeding; non-BF non-breastfeeding; PP postpartum; DMT disease-modifying therapy; RRMS relapsing remitting MS; Preg pregnancy; mo months; N/A not available; RCT randomized controlled trial; IVIG intravenous immunoglobulin; T3 third trimester; IFN β interferon β; SPMS secondary progressive MS; CI confidence interval; h hour; d day; EHR electronic health record; GA glatiramer acetate

<sup>a</sup>A main study goal was not to evaluate BF.

<sup>b</sup>DMT use only reported for within 1 year prior to pregnancy.

**eFigure 1.** Funnel plot evaluating for publication bias with no publication bias demonstrated.

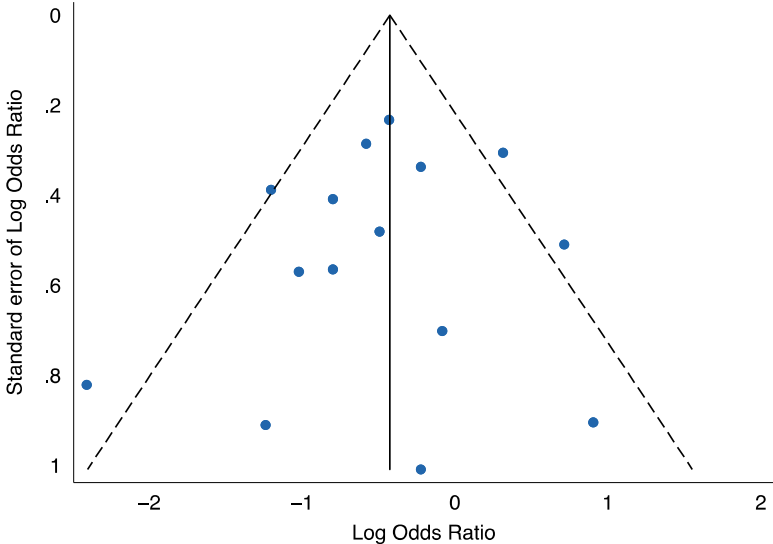



**eFigure 2.** Stratified Data on Association of Breastfeeding (BF) With Postpartum Multiple Sclerosis Relapses in Studies Reporting 3-Month and 6-Month Postpartum Relapse Outcomes

**A** 3-mo Postpartum relapse

| Source                              | OR (95% CI)      |
|-------------------------------------|------------------|
| Benoit et al, <sup>3</sup> 2016     | 0.36 (0.12-1.12) |
| Confavreux et al, <sup>4</sup> 1998 | 0.80 (0.40-1.50) |
| Haas et al, <sup>9</sup> 2007       | 0.61 (0.24-1.58) |
| Runia et al, <sup>22</sup> 2015     | 0.92 (0.23-3.59) |
| Overall $I^2=0.0\%$ ; $P=.64$       | 0.67 (0.42-1.05) |

Weights are from random-effects analysis.

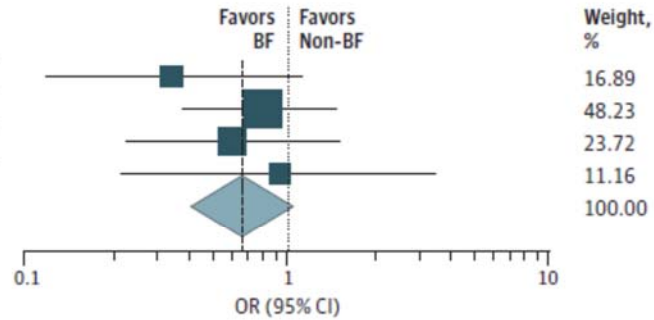

**B** 6-mo Postpartum relapse

| Source                                     | OR (95% CI)       |
|--------------------------------------------|-------------------|
| Fernández Liguori et al, <sup>7</sup> 2012 | 2.47 (0.42-14.53) |
| Gulick et al, <sup>8</sup> 2002            | 0.31 (0.15-0.67)  |
| Hanulíková et al, <sup>10</sup> 2013       | 0.45 (0.15-1.37)  |
| Hellwig et al, <sup>12</sup> 2015          | 0.56 (0.32-0.98)  |
| Worthington et al, <sup>24</sup> 1994      | 0.80 (0.11-5.74)  |
| Overall $I^2=21.5\%$ ; $P=.28$             | 0.52 (0.32-0.84)  |

Weights are from random-effects analysis.

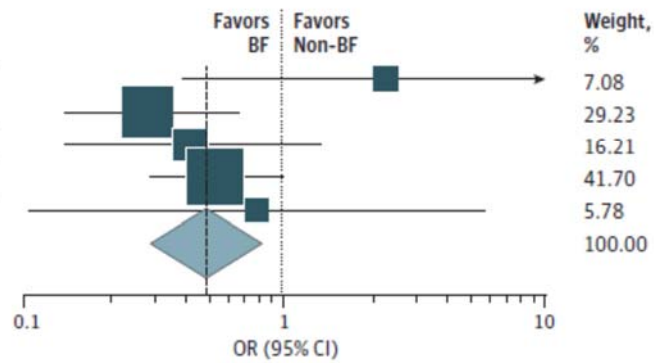

## eReferences.

1. Achiron A, Kishner I, Dolev M, et al. Effect of intravenous immunoglobulin treatment on pregnancy and postpartum-related relapses in multiple sclerosis. *J Neurol*. 2004;251(9):1133-1137.
2. Airas L, Jalkanen A, Alanen A, Pirttilä T, Marttila RJ. Breast-feeding, postpartum and prepregnancy disease activity in multiple sclerosis. *Neurology*. 2010;75(5):474-476.
3. Benoit A, Durand-Dubief F, Amato M-P, et al. History of multiple sclerosis in 2 successive pregnancies: A French and Italian cohort. *Neurology*. 2016;87(13):1360-1367.
4. Confavreux C, Hutchinson M, Hours MM, Cortinovis-Tourniaire P, Moreau T. Rate of pregnancy-related relapse in multiple sclerosis. Pregnancy in Multiple Sclerosis Group. *N Engl J Med*. 1998;339(5):285-291.
5. De Las Heras V, De Andrés C, Téllez N, Tintoré M, EMPATIE Study Group. Pregnancy in multiple sclerosis patients treated with immunomodulators prior to or during part of the pregnancy: A descriptive study in the Spanish population. *Mult Scler*. 2007;13(8):981-984.
6. Fernández Liguori N, Klajn D, Acion L, et al. Epidemiological characteristics of pregnancy, delivery, and birth outcome in women with multiple sclerosis in Argentina (EMEMAR study). *Mult Scler*. 2009;15(5):555-562.
7. Fernández Liguori N, Klajn D., Saladino M.L., Silva B., Cáceres F., Garcea O. Breastfeeding and risk of postpartum relapses in women with multiple sclerosis. *Mult Scler*. 2012;18(S5):1825-1826.
8. Gulick EE, Halper J. Influence of infant feeding method on postpartum relapse of mothers with MS. *Int J MS Care*. 2002;4(4):183–191.
9. Haas J, Hommes OR. A dose comparison study of IVIG in postpartum relapsing-remitting multiple sclerosis. *Mult Scler*. 2007;13(7):900-908.
10. Hanulíková P., Vlk R., Meluzínová E., Rob L. Pregnant women with multiple sclerosis at the Motol Hospital Prague 2007-2011: Outcomes analysis. *Actual Gyn*. 2013;5(1):27-32.
11. Hellwig K, Haghikia A, Agne H, Beste C, Gold R. Protective effect of breastfeeding in postpartum relapse rate of mothers with multiple sclerosis. *Arch Neurol*. 2009;66(12):1580-1581; author reply 1581.
12. Hellwig K, Rockhoff M, Herbstritt S, et al. Exclusive Breastfeeding and the Effect on Postpartum Multiple Sclerosis Relapses. *JAMA Neurol*. 2015;72(10):1132-1138.

13. Horvat Ledinek A., Sega Jazbec S., Rot U., Pirecnik Noc A. Effect of intravenous immunoglobulin treatment on postpartum-related relapses in multiple sclerosis. *Mult Scler*. 2013;19(S1):469-470.
14. Iorio R, Nociti V, Frisullo G, Patanella A, Tonali P, Batocchi A. Breastfeeding and Multiple Sclerosis. *Arch Neurol*. 2009;66(12):1580.
15. Jesus-Ribeiro J, Correia I, Martins AI, et al. Pregnancy in Multiple Sclerosis: A Portuguese cohort study. *Mult Scler Relat Disord*. 2017;17:63-68.
16. Langer-Gould A, Huang SM, Gupta R, et al. Exclusive breastfeeding and the risk of postpartum relapses in women with multiple sclerosis. *Arch Neurol*. 2009;66(8):958-963.
17. Langer-Gould A, Smith J, Albers K, et al. Pregnancy-related Relapses in a Large, Contemporary Multiple Sclerosis Cohort: No Increased Risk in the Postpartum Period. *Neurology*. 2019:S6.007.
18. Nelson LM, Franklin GM, Jones MC. Risk of multiple sclerosis exacerbation during pregnancy and breast-feeding. *JAMA*. 1988;259(23):3441-3443.
19. Nikseresht A., Rezaiean Jahromi F., Sharifian Dorche M. Brain MRI activity in multiple sclerosis(MS) before and after pregnancy. *Mult Scler*. 2017;23(S3):718.
20. Perez-Sanchez S., Eichau-Madueño S., Rus-Hidalgo M., Navarro-Mascarell G., Izquierdo G. The role of breastfeeding in multiple sclerosis patients. *Mult Scler*. 2014;20(S1):441.
21. Portaccio E, Ghezzi A, Hakiki B, et al. Postpartum relapses increase the risk of disability progression in multiple sclerosis: The role of disease modifying drugs. *J Neurol Neurosurg Psychiatry*. 2014;85(8):845-850.
22. Runia TF, Neuteboom RF, de Groot CJM, de Rijke YB, Hintzen RQ. The influence of vitamin D on postpartum relapse and quality of life in pregnant multiple sclerosis patients. *Eur J Neurol*. 2015;22(3):479-484.
23. Sahebi Vaighan N., Abadi A., Ghozat R., Delavar Kasmaei H., Gharagozli K. The effect of exclusive breastfeeding on postpartum multiple sclerosis relapses. *Mult Scler*. 2017;23(S3):705-706.
24. Worthington J, Jones R, Crawford M, Forti A. Pregnancy and multiple sclerosisâ A 3-year prospective study. *J Neurol*. 1994;241(4):228-233.
